# Supplementary material for: Phytoplankton and Bacterial Communities’ Patterns in a Highly Dynamic Ecosystem (Central Mediterranean Sea)
Source: MDPI journal article supplement (doi:10.3390/w14132057), 2022-06-27
Supplement: s1 [file s1]

Table S1: Information on the sampling stations during the SAMCA IV cruise

| <i>Date</i><br><i>dd/mm/yy</i> | <i>Station</i><br><i>n.</i> | <i>Time</i><br><i>hr</i> | <i>Latitude N</i><br><i>deg. min. sec.</i> | <i>Longitude E</i><br><i>deg. min. sec.</i> |
|--------------------------------|-----------------------------|--------------------------|--------------------------------------------|---------------------------------------------|
| 17/02/04                       | 1                           | 8.41                     | 38°50' 01                                  | 15°23' 02                                   |
| 17/02/04                       | 2                           | 13.41                    | 38°31' 86                                  | 15°22' 77                                   |
| 17/02/04                       | 3                           | 17.53                    | 38°19' 91                                  | 15°23' 54                                   |
| 17/02/04                       | 4                           | 19.49                    | 38°18' 43                                  | 15°35' 20                                   |
| 18/02/04                       | 20                          | 14.52                    | 38°16' 99                                  | 15°42' 31                                   |
| 18/02/04                       | 21                          | 15.43                    | 38°16' 48                                  | 15°44' 98                                   |
| 18/02/04                       | 22                          | 15.56                    | 38°16' 05                                  | 15°45' 26                                   |
| 19/02/04                       | 25                          | 9.14                     | 37°45' 00                                  | 15°35' 00                                   |
| 19/02/04                       | 26                          | 13.16                    | 38°01' 30                                  | 15°37' 74                                   |
| 19/02/04                       | 29                          | 16.48                    | 38°01' 27                                  | 15°32' 95                                   |
| 19/02/04                       | 31                          | 18.58                    | 38°02' 84                                  | 15°29' 54                                   |
| 20/02/04                       | 51                          | 10.14                    | 38°13' 37                                  | 15°35' 02                                   |
| 20/02/04                       | 52                          | 12.15                    | 38°03' 20                                  | 15°29' 02                                   |
| 20/02/04                       | 53                          | 15.34                    | 38°05' 98                                  | 15°34' 24                                   |
| 20/02/04                       | 54                          | 16.31                    | 38°07' 00                                  | 15°32' 00                                   |
| 20/02/04                       | 57                          | 18.24                    | 38°14' 28                                  | 15°35' 75                                   |
| 20/02/04                       | 57A                         | 19.15                    | 38°14' 30                                  | 15°35' 76                                   |
| 20/02/04                       | 60                          | 21.10                    | 38°14' 80                                  | 15°37' 05                                   |
| 20/02/04                       | 61                          | 21.30                    | 38°14' 49                                  | 15°37' 26                                   |
| 20/02/04                       | 62                          | 21.52                    | 38°13' 97                                  | 15°37' 65                                   |
| 21/02/04                       | 71                          | 9.13                     | 38°11' 40                                  | 15°35' 15                                   |
| 21/02/04                       | 73                          | 10.36                    | 38°11' 48                                  | 15°36' 76                                   |
| 21/02/04                       | 76                          | 14.32                    | 38°15' 72                                  | 15°42' 80                                   |
| 21/02/04                       | 78                          | 15.44                    | 38°15' 66                                  | 15°39' 36                                   |
| 21/02/04                       | 80                          | 16.32                    | 38°15' 20                                  | 15°39' 92                                   |
